# Supplementary material
Source: PubMed Central journal article supplement (PMC10266522)
Supplement: NIHMS1887510-supplement-Figure_1.pdf [file NIHMS1887510-supplement-Figure_1.pdf]

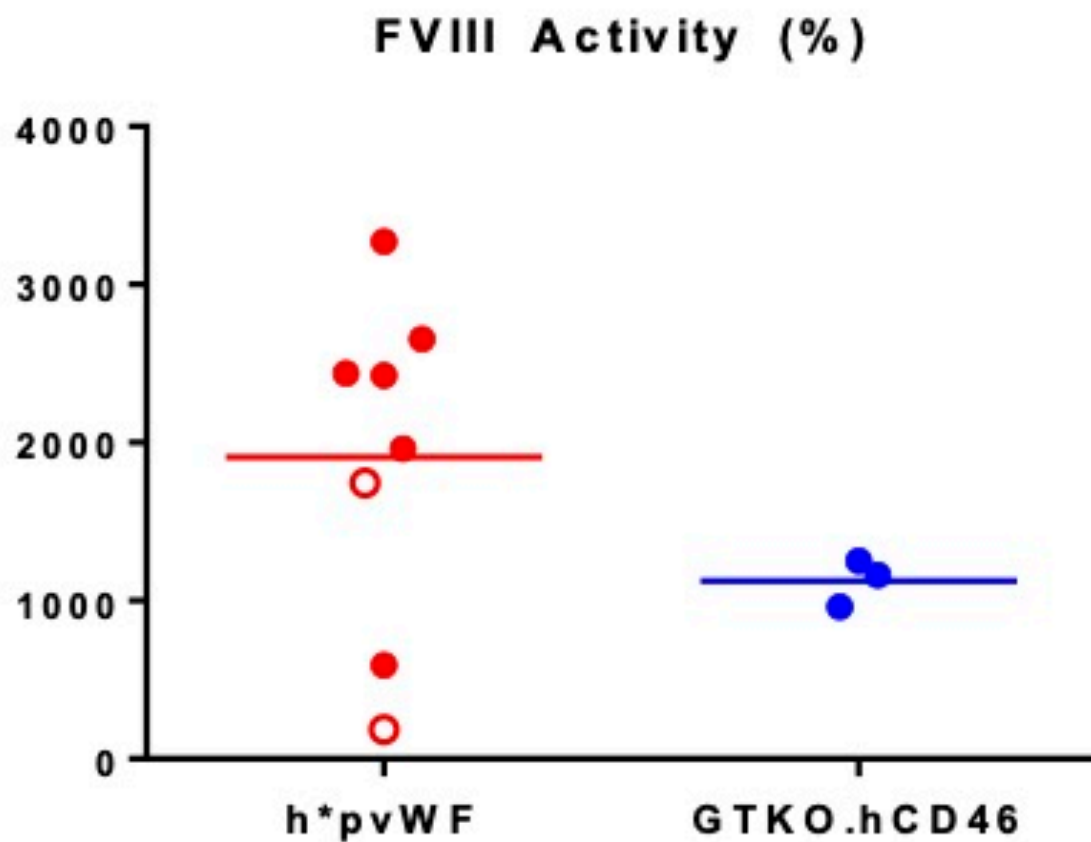

**Supplementary Figure 1. FVIII activity of h\*pvWF and background genetics (GTKO.hCD46) in plasma. FVIII activity is similar in both groups of h\*pvWF and GTKO.hCD46 pigs. Monoallelic (Mono-A) modification is represented as unfilled red circles.**
