# Supplementary material
Source: PubMed Central journal article supplement (PMC10266522)
Supplement: NIHMS1887510-supplement-Figure_2.pdf [file NIHMS1887510-supplement-Figure_2.pdf]

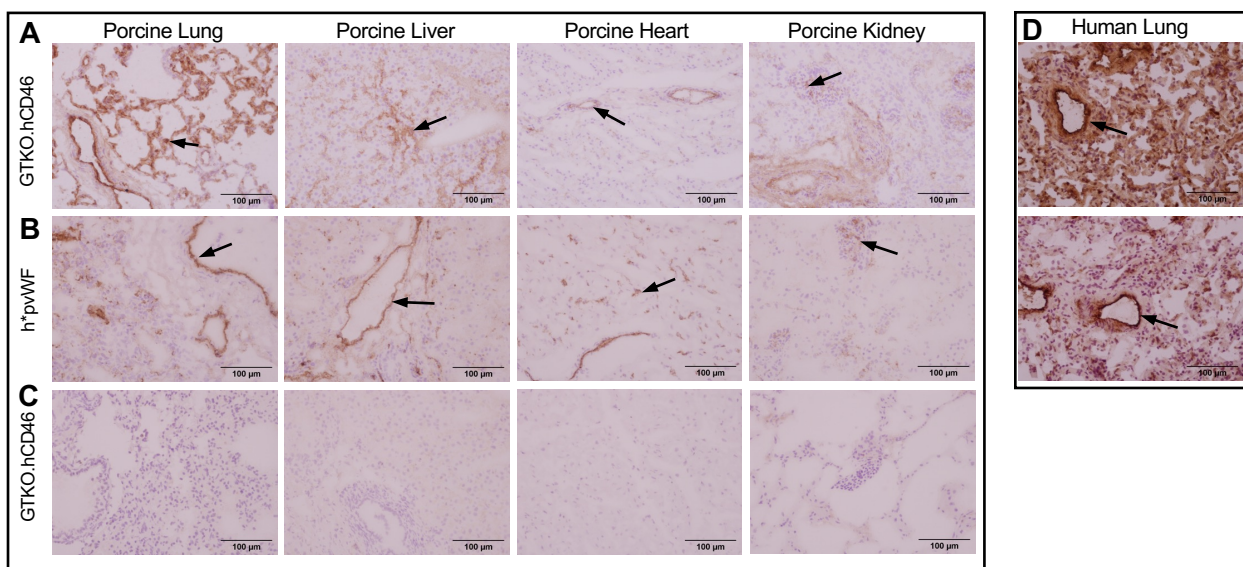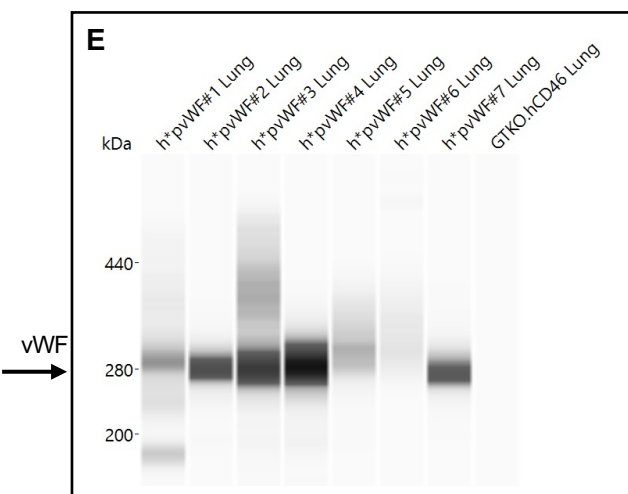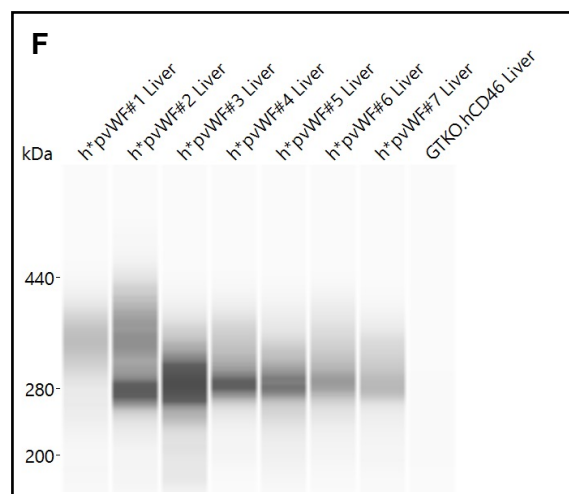

**Supplementary Figure 2. Immunohistochemistry and capillary electrophoresis analysis of vWF expression. (A)** OCT-embedded sections GTKO.hCD46 porcine lung, liver, heart and kidney, probed with a polyclonal antibody to full length human vWF that cross-reacts with porcine vWF. Staining highlights endogenous endothelial expression (black arrows). **(B)** OCT- embedded sections h\*pvWF porcine lung, liver, heart and kidney stained with a human-specific monoclonal antibody against GPIb binding domain indicating the presence of humanized vWF protein. **(C)** Human-specific antibody failed to detect a signal for porcine vWF in tissues from GTKO.hCD46 control pigs. **(D)** vWF detection in human lung samples act as a positive control for both antibodies. **(E & F)** Capillary Western blots of lung and liver tissue lysates from h\*VWF and GTKO.hCD46 pigs using a monoclonal, human-specific anti-vWF antibody. h\*pvWF is expressed in all samples at expected molecular weight. h\*pvWF #1-2 are Mono-A and #3-6 are Bi-A.
