# Supplementary material
Source: PubMed Central journal article supplement (PMC10266522)
Supplement: NIHMS1887510-supplement-Figure_3.pdf [file NIHMS1887510-supplement-Figure_3.pdf]

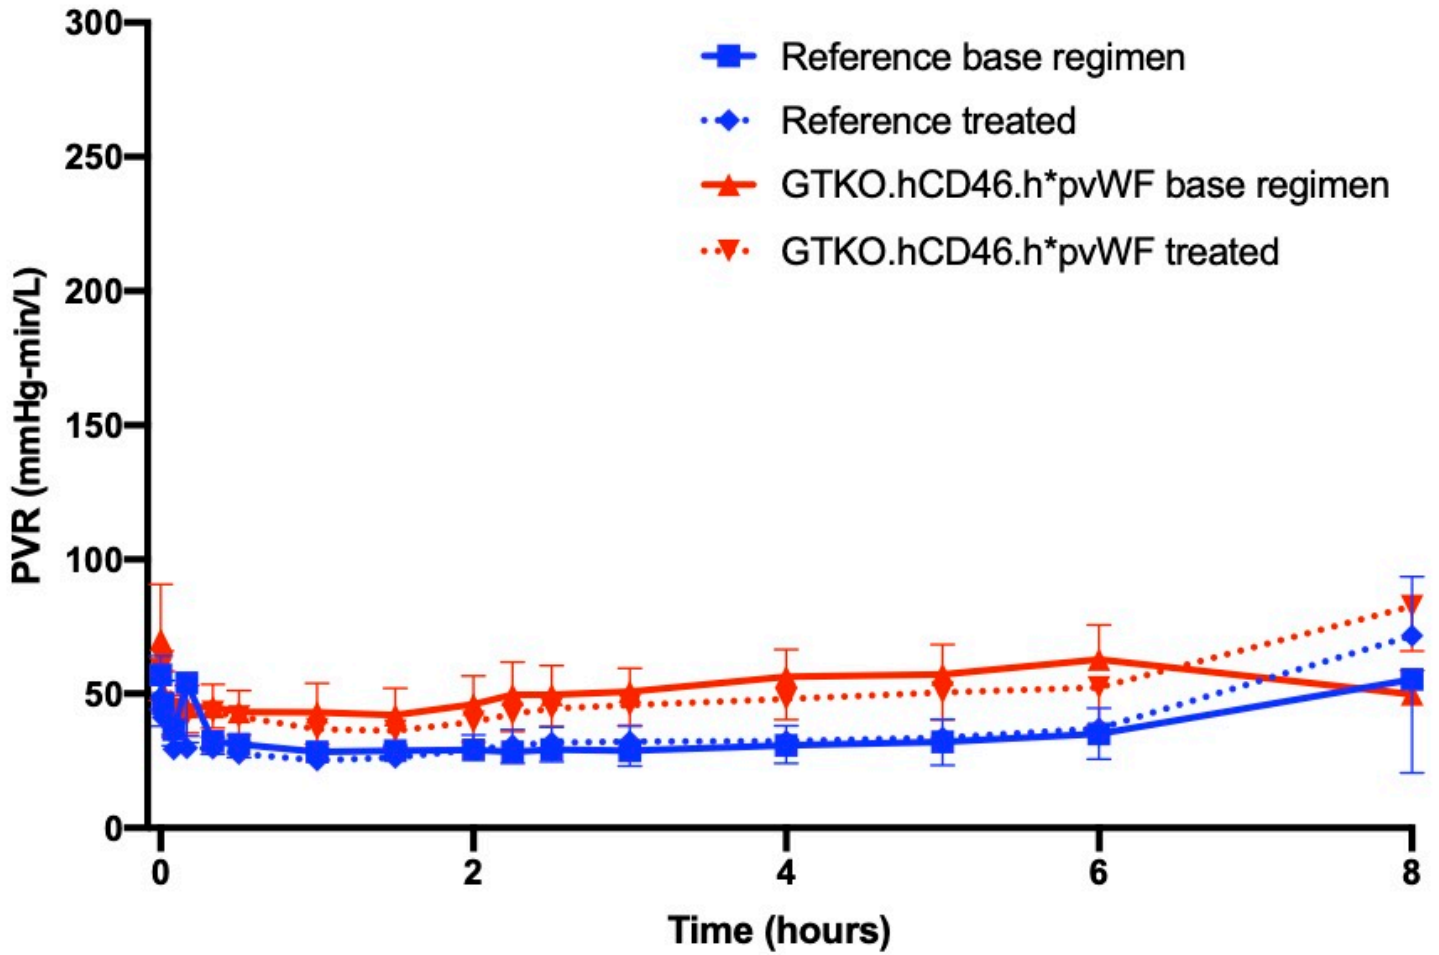

**Supplementary Figure 3. Pulmonary vascular resistance (PVR) in *ex vivo* lung perfusion.** PVR remained low and clinically insignificant among all groups throughout the duration of the experiment. Error bars represent standard error of the mean.
