# Supplementary material
Source: PubMed Central journal article supplement (PMC10266522)
Supplement: NIHMS1887510-supplement-Figure_4.pdf [file NIHMS1887510-supplement-Figure_4.pdf]

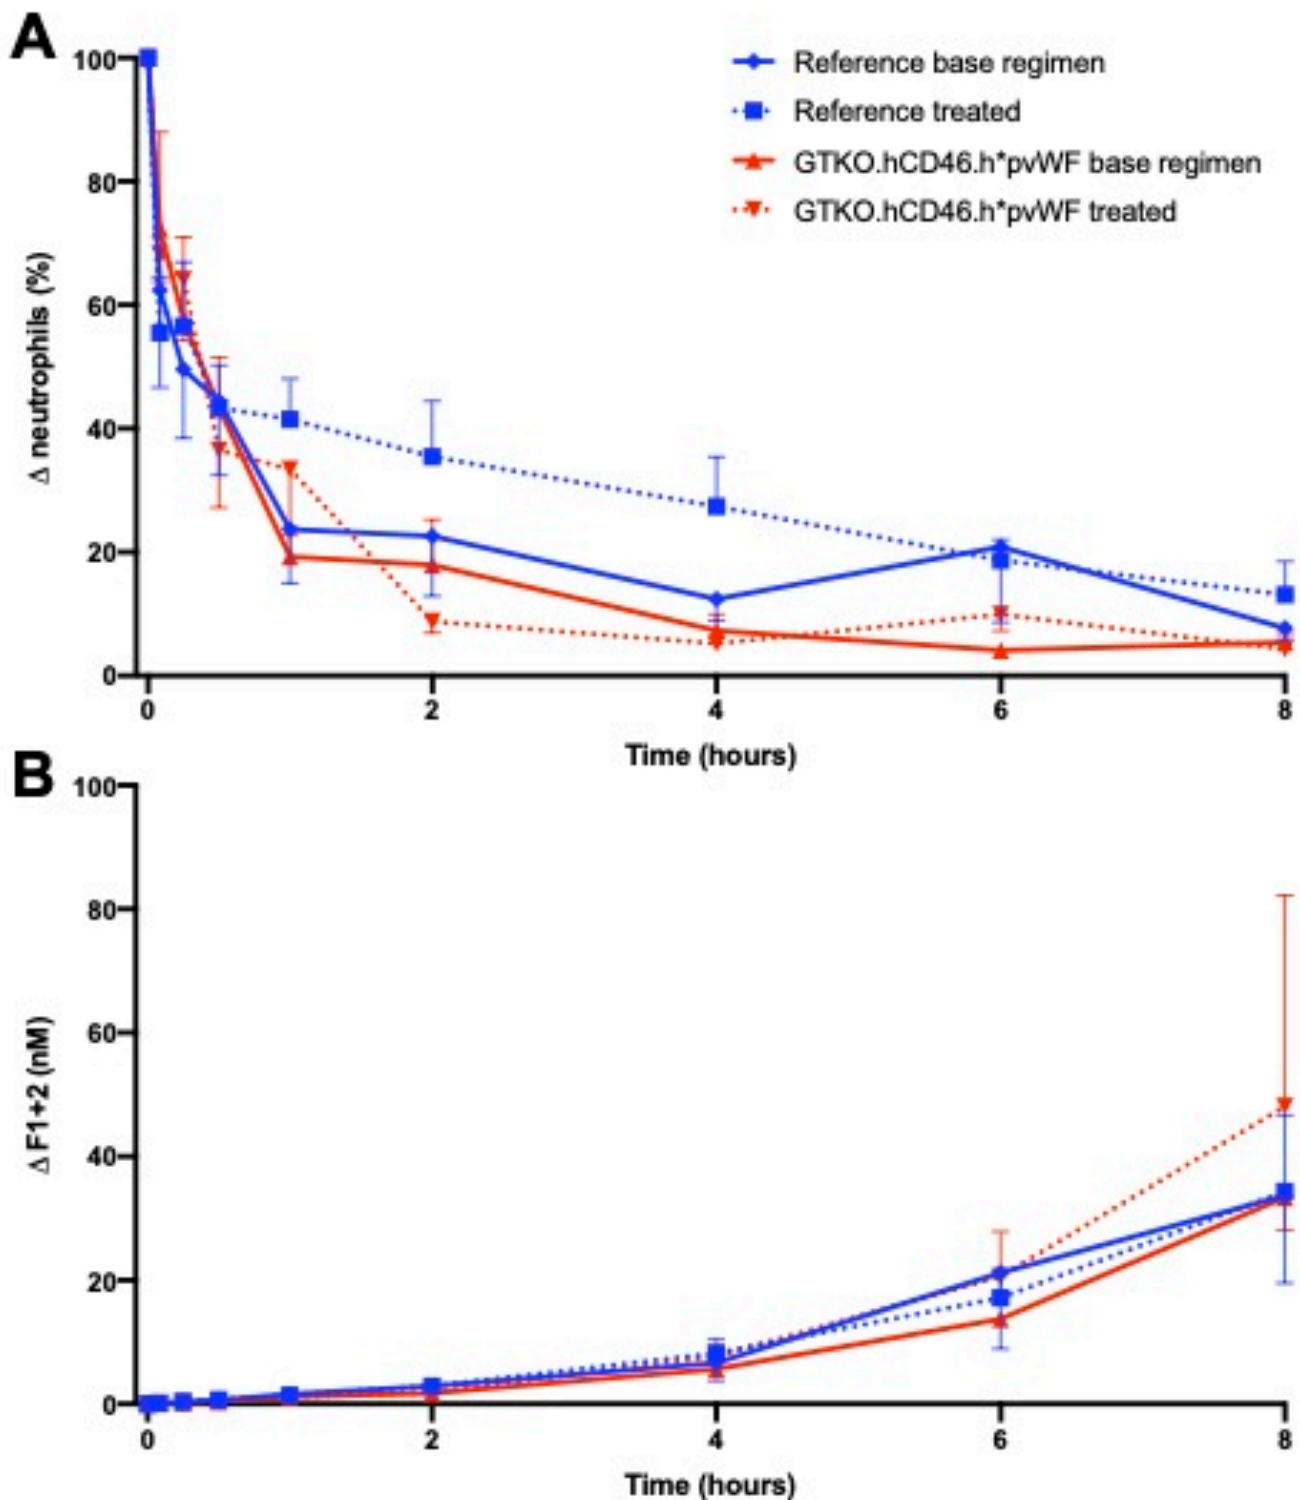

**Supplementary Figure 4. *Ex vivo* lung perfusion demonstrated similar results in other measured factors.** There were no differences in **(A)** sequestration of neutrophils, nor in **(B)** rise in F1+2, regardless of genetics or treatment. Error bars represent standard error of the mean.
