# Supplementary material
Source: PubMed Central journal article supplement (PMC10266522)
Supplement: NIHMS1887510-supplement-Table_S1.pdf [file NIHMS1887510-supplement-Table_S1.pdf]

**Supplementary Table 1 | Genetics and treatment of all *ex vivo* and *in vivo* experiments included in this study.**

|                         | Group                  | Experiment ID | Pig ID              | Genetics                    | Treatment                                    |
|-------------------------|------------------------|---------------|---------------------|-----------------------------|----------------------------------------------|
| <i>Ex vivo</i><br>lung  | h*pvWF treated         | <b>LB188L</b> | 871-01 <sup>1</sup> | GTKO.hCD46.h*pvWF           | aGPIb, Fam/BIA, GMI-1271, H52, PSGL-1        |
|                         |                        | <b>LB189R</b> | 871-02 <sup>1</sup> | GTKO.hCD46.h*pvWF           | aGPIb, Fam/BIA, GMI-1271, H52, PSGL-1        |
|                         |                        | <b>LB193L</b> | 873-01              | GTKO.hCD46.h*pvWF           | aGPIb, Fam/BIA, GMI-1271, H52, PSGL-1        |
|                         |                        | <b>LB200R</b> | 922-01              | GTKO.hCD46.h*pvWF           | aGPIb, Fam/BIA, GMI-1271, PSGL-1, DDAVP      |
|                         |                        | <b>LB202R</b> | 934-02              | GTKO.hCD46.h*pvWF           | aGPIb, Fam/BIA, GMI-1271, IB4, PSGL-1, DDAVP |
|                         | h*pvWF base regimen    | <b>LB188R</b> | 871-01 <sup>1</sup> | GTKO.hCD46.h*pvWF           | aGPIb, Fam/BIA                               |
|                         |                        | <b>LB193R</b> | 873-01              | GTKO.hCD46.h*pvWF           | aGPIb, Fam/BIA                               |
|                         |                        | <b>LB201R</b> | 934-01              | GTKO.hCD46.h*pvWF           | aGPIb, Fam/BIA, DDAVP                        |
|                         |                        | <b>LB209L</b> | 973-01              | GTKO.hCD46.h*pvWF           | aGPIb, Fam/BIA, DDAVP                        |
|                         |                        | <b>LB210R</b> | 970-01              | GTKO.hCD46.h*pvWF           | aGPIb, Fam/BIA, DDAVP                        |
|                         | Reference treated      | <b>LB179R</b> | 851-05              | GTKO.hCD46                  | aGPIb, Fam/BIA, DDAVP, H52                   |
|                         |                        | <b>LB180L</b> | 857-03              | GTKO.hCD46                  | aGPIb, Fam/BIA, DDAVP, H52                   |
|                         |                        | <b>LB181R</b> | 857-04              | GTKO.hCD46                  | aGPIb, Fam/BIA, GMI-1271, H52, DDAVP         |
|                         |                        | <b>LB184R</b> | 859-06              | GTKO.hCD46                  | aGPIb, Fam/BIA, GMI-1271, H52, PSGL-1, DDAVP |
|                         |                        | <b>LB185L</b> | 859-05              | GTKO.hCD46                  | aGPIb, Fam/BIA, GMI-1271, H52, PSGL-1, DDAVP |
|                         | Reference base regimen | <b>LB179L</b> | 851-05              | GTKO.hCD46                  | aGPIb, Fam/BIA, DDAVP                        |
|                         |                        | <b>LB180R</b> | 857-03              | GTKO.hCD46                  | aGPIb, Fam/BIA, DDAVP                        |
|                         |                        | <b>LB181L</b> | 857-04              | GTKO.hCD46                  | aGPIb, Fam/BIA, DDAVP                        |
|                         |                        | <b>LB184L</b> | 859-06              | GTKO.hCD46                  | aGPIb, Fam/BIA, DDAVP                        |
|                         |                        | <b>LB185R</b> | 859-05              | GTKO.hCD46                  | aGPIb, Fam/BIA, DDAVP                        |
| <i>Ex vivo</i><br>liver | h*pvWF treated         | <b>JL32</b>   | 871-01 <sup>1</sup> | GTKO.hCD46.h*pvWF           | aGPIb, Fam/BIA, Remodulin, Heparin, Insulin  |
|                         |                        | <b>JL33</b>   | 871-02 <sup>1</sup> | GTKO.hCD46.h*pvWF           | aGPIb, Fam/BIA, Remodulin, Heparin, Insulin  |
|                         |                        | <b>JL34</b>   | 873-01              | GTKO.hCD46.h*pvWF           | aGPIb, Fam/BIA, Remodulin, Heparin, Insulin  |
|                         |                        | <b>JL39</b>   | 922-01              | GTKO.hCD46.h*pvWF           | aGPIb, Fam/BIA, Remodulin, Heparin, Insulin  |
|                         |                        | <b>JL40</b>   | 934-01              | GTKO.hCD46.h*pvWF           | aGPIb, Fam/BIA, Remodulin, Heparin, Insulin  |
|                         |                        | <b>JL44</b>   | 973-01              | GTKO.hCD46.h*pvWF           | aGPIb, Fam/BIA, Remodulin, Heparin, Insulin  |
|                         |                        | <b>JL45</b>   | 970-01              | GTKO.hCD46.h*pvWF           | aGPIb, Fam/BIA, Remodulin, Heparin, Insulin  |
|                         | Reference treated      | <b>JL20</b>   | 816-11              | GTKO.hCD46                  | aGPIb, Fam/BIA, Remodulin, Heparin, Insulin  |
|                         |                        | <b>JL24</b>   | 852-02              | GTKO.hCD46                  | aGPIb, Fam/BIA, Remodulin, Heparin, Insulin  |
|                         |                        | <b>JL25</b>   | 850-12              | GTKO.hCD46                  | aGPIb, Fam/BIA, Remodulin, Heparin, Insulin  |
|                         |                        | <b>JL26</b>   | 850-06              | GTKO.hCD46                  | aGPIb, Fam/BIA, Remodulin, Heparin, Insulin  |
|                         | Reference untreated    | <b>JL27</b>   | 850-04              | GTKO.hCD46                  | Remodulin, Heparin, Insulin                  |
| <b>JL28</b>             |                        | 851-05        | GTKO.hCD46          | Remodulin, Heparin, Insulin |                                              |

|                        |                      |              |                     |                                  |                                                                                                                            |
|------------------------|----------------------|--------------|---------------------|----------------------------------|----------------------------------------------------------------------------------------------------------------------------|
|                        |                      | <b>JL29</b>  | 857-03              | GTKO.hCD46                       | Remodulin, Heparin, Insulin                                                                                                |
|                        |                      | <b>JL30</b>  | 857-04              | GTKO.hCD46                       | Remodulin, Heparin, Insulin                                                                                                |
|                        |                      |              |                     |                                  |                                                                                                                            |
| <i>In vivo</i><br>lung | h*pvWF               | <b>ILB46</b> | 871-02 <sup>1</sup> | GTKO.hCD46.h*pvWF                | aGPIb, Fam/BIA, GMI-1271, H52, PSGL-1, ATG, Prednisolone, 2C10R4, MMF, Actemra, C1-Inh, iNO, A1AT                          |
|                        |                      | <b>ILB53</b> | 922-01              | GTKO.hCD46.h*pvWF                | aGPIb, Fam/BIA, GMI-1271, H52, PSGL-1, ATG, Prednisolone, 2C10R4, MMF, Actemra, C1-Inh, iNO, A1AT, aCD20                   |
|                        |                      | <b>ILB54</b> | 934-01              | GTKO.hCD46.h*pvWF                | aGPIb, Fam/BIA, GMI-1271, PSGL-2, ATG, Prednisolone, 2C10R4, MMF, Actemra, C1-Inh, iNO, aCD20, CVF                         |
|                        | Genetic control      | <b>IBN1</b>  | n/a                 | GTKO.hCD46                       | Prednisolone, C1-Inh, iNO                                                                                                  |
|                        |                      | <b>IBN2</b>  | n/a                 | GTKO.hCD46                       | Prednisolone, C1-Inh, iNO, Hirulog                                                                                         |
|                        |                      | <b>ILB2</b>  | 359-07              | GTKO.hCD46                       | Prednisolone, C1-Inh, iNO                                                                                                  |
|                        |                      | <b>ILB4</b>  | 398-03              | GTKO.hCD46                       | aGPIb, Prednisolone, C1-Inh, iNO                                                                                           |
|                        |                      | <b>ILB5</b>  | 408-05              | GTKO.hCD46                       | aGPIb, Prednisolone, C1-Inh, iNO                                                                                           |
|                        | Experimental control | <b>ILB18</b> | 618-02              | GTKO.hCD46.hCD47.A20             | aGPIb, Fam/BIA, Prednisolone, C1-Inh, iNO                                                                                  |
|                        |                      | <b>ILB19</b> | 620-01              | GTKO.hCD46.hCD47.A20             | aGPIb, Fam/BIA, Prednisolone, C1-Inh, iNO                                                                                  |
|                        |                      | <b>ILB59</b> | 953-01              | GTKO.hCD46.HLA-E                 | aGPIb, Fam/BIA, GMI-1271, PSGL-1, ATG, Prednisolone, 2C10R4, MMF, Actemra, C1-Inh, iNO, aCD20, CVF, IB4, Reparixin         |
|                        |                      | <b>ILB60</b> | 965-01              | GTKO.hCD46.HLA-E. $\beta$ 4GalKO | aGPIb, Fam/BIA, GMI-1271, PSGL-1, ATG, Prednisolone, 2C10R4, MMF, Actemra, C1-Inh, iNO, aCD20, CVF, IB4, Reparixin, Enbril |
|                        |                      | <b>ILB61</b> | 965-02              | GTKO.hCD46.HLA-E. $\beta$ 4GalKO | aGPIb, Fam/BIA, GMI-1271, PSGL-1, ATG, Prednisolone, 2C10R4, MMF, Actemra, C1-Inh, iNO, aCD20, CVF, IB4, Reparixin, Enbril |

<sup>1</sup> = Pigs denoted with this symbol had a monoallelic excision, and therefore expressed only one allele of humanized pvWF. All other h\*pvWF pigs expressed two alleles of humanized pvWF.
